# Supplementary material for: Role of clinical and biochemical inflammation in structural progression of patients with psoriatic arthritis
Source: HighWire-hosted journal article supplement (doi:10.1136/rmdopen-2021-002038), 2021-12-01
Supplement: rmdopen-2021-002038supp001_data_supplement.pdf [file rmdopen-2021-002038supp001_data_supplement.pdf]

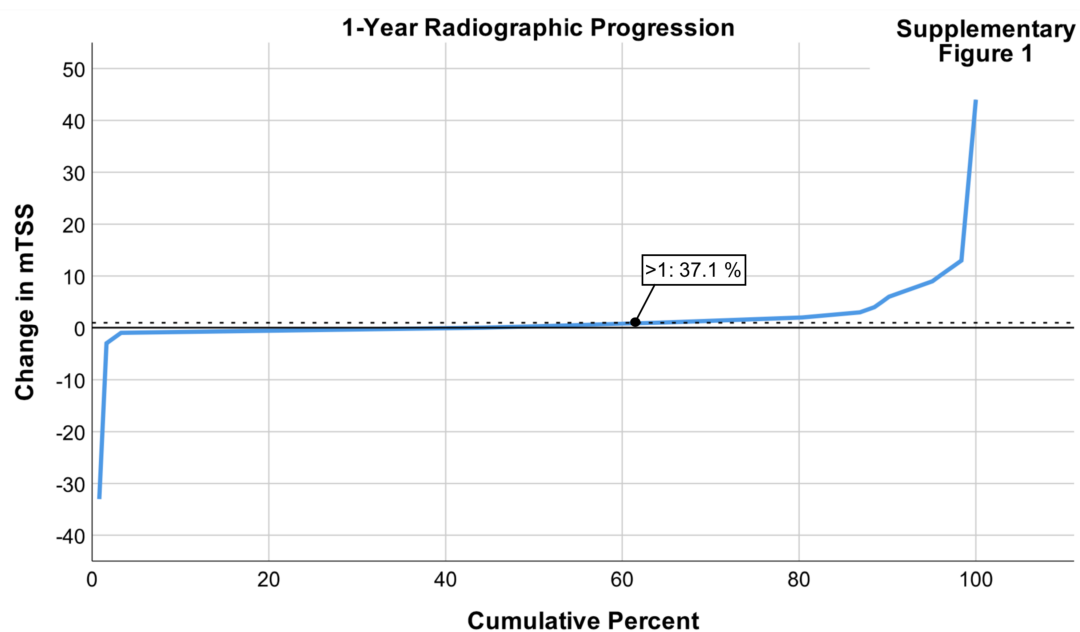

**Supplementary Figure 1.** Cumulative distribution of structural progression across all patients of the real-life cohort. 37.1 % of all patients were identified as progressors.
